# Supplementary material for: Ultrasensitive Label-free Electrochemical Immunosensor based on Multifunctionalized Graphene Nanocomposites for the Detection of Alpha Fetoprotein
Source: PubMed Central journal article supplement (PMC5301246; doi:10.1038/srep42361), 2017-02-10
Supplement: srep42361-s1.pdf [file srep42361-s1.pdf]

*Supplementary materials*

**Ultrasensitive label-free electrochemical immunosensor based  
on multifunctionalized graphene nanocomposites for the  
detection of alpha fetoprotein**

Yaoguang Wang, Yong Zhang, Dan Wu, Hongmin Ma, Xuehui Pang, Dawei Fan, Qin Wei,

Bin Du\*

Key Laboratory of Chemical Sensing & Analysis in Universities of Shandong, School of  
Chemistry and Chemical Engineering, University of Jinan, Jinan 250022, P.R. China.

\*Corresponding author. Tel. + 86 531 82767872; fax: + 86 531 82767367.

E-mail address: dubin61@gmail.com

**Table S1** Comparison of different methods for the detection of AFP

| Method                                                         | Linear range            | Detection limit | Reference      |
|----------------------------------------------------------------|-------------------------|-----------------|----------------|
| Label-free electrochemiluminescence immunosensor               | 0.0005 ~ 50<br>pg/mL    | 0.2 fg/mL       | 1              |
| Sandwich-type electrochemiluminescence immunosensor            | 0.005 ~ 0.2<br>pg/mL    | 1.0 fg/mL       | 2              |
| Label-free electrochemical immunosensor                        | 0.00005 ~ 250<br>ng/mL  | 1.1 fg/mL       | 3              |
| Sandwich-type electrochemical immunosensor                     | 0.0001 ~ 50<br>ng/mL    | 33 fg/mL        | 4              |
| Sandwich-type electrochemical immunosensor                     | 0.0001 ~ 10<br>ng/mL    | 0.05 pg/mL      | 5              |
| Label-free electrochemical impedance spectroscopy immunosensor | 1 ~ 100 pg/mL           | 0.1 pg/mL       | 6              |
| Label-free electrochemical immunosensor                        | 0.001 ~ 45 ng/mL        | 0.13 pg/mL      | 7              |
| Sandwich-type electrochemical immunosensor                     | 0.001 ~ 5 ng/mL         | 0.2 pg/mL       | 8              |
| Sandwich-type electrochemical immunosensor                     | 0.01 ~ 60 ng/mL         | 1.6 pg/mL       | 9              |
| Label-free electrochemiluminescence immunosensor               | 0.005 ~ 14 ng/mL        | 2.0 pg/mL       | 10             |
| Sandwich-type electrochemical immunosensor                     | 0.01 ~ 40 ng/mL         | 2.3 pg/mL       | 11             |
| Label-free electrochemiluminescent immunosensor                | 0.01 ~ 100 ng/mL        | 3.3 pg/mL       | 12             |
| Label-free electrochemical immunosensor                        | 0.01 ~ 75 ng/mL         | 4.0 pg/mL       | 13             |
| Label-free electrochemical immunosensor                        | 0.01 ~ 12 ng/mL         | 5.0 pg/mL       | 14             |
| Sandwich-type electrochemical immunosensor                     | 0.05 ~ 30 ng/mL         | 5.0 pg/mL       | 15             |
| Competitive electrochemical immunosensor                       | 0.05 ~ 100 ng/mL        | 5.0 pg/mL       | 16             |
| Label-free photoelectrochemical immunosensor                   | 0.1 ~ 500 ng mL         | 10 pg/mL        | 17             |
| Label-free electrochemical immunosensor                        | 0.1 ~ 30 ng mL          | 18 pg/mL        | 18             |
| Sandwich-type electrochemiluminescence immunosensor            | 0.05 ~ 50 ng/mL         | 30 pg/mL        | 19             |
| Sandwich-type electrochemical immunosensor                     | 0.5 ~ 80 ng/mL          | 250 pg/mL       | 20             |
| Label-free electrochemical immunosensor                        | 0.00001 ~ 10.0<br>ng/mL | 2.7 fg/mL       | This<br>method |

**Table S2** Human serum sample analysis using the designed method and the ELISA method

| Sample | This method (ng/mL) <sup>a</sup> | ELISA (ng/mL) <sup>a</sup> | Relative error (%) |
|--------|----------------------------------|----------------------------|--------------------|
| 1      | 2.22                             | 2.14                       | 3.7                |
| 2      | 4.42                             | 4.65                       | -4.9               |
| 3      | 7.52                             | 7.23                       | 4.0                |

<sup>a</sup> Each value is the average of five measurements.

## References:

1. Guo, Z., Hao, T., Duan, J., Wang, S. & Wei, D. Electrochemiluminescence immunosensor based on graphene-CdS quantum dots-agarose composite for the ultrasensitive detection of alpha fetoprotein. *Talanta* **89**, 27-32 (2012).
2. Wang, H., Sun, D., Tan, Z., Gong, W. & Wang, L. Electrochemiluminescence immunosensor for  $\alpha$ -fetoprotein using Ru(bpy)<sub>3</sub><sup>2+</sup>-encapsulated liposome as labels. *Colloid. Surface. B* **84**, 515-519 (2011).
3. Liu, K., Zhang, J., Liu, Q. & Huang, H. Electrochemical immunosensor for alpha-fetoprotein determination based on ZnSe quantum dots/Azure I/gold nanoparticles/poly (3,4-ethylenedioxythiophene) modified Pt electrode. *Electrochim. Acta* **114**, 448-454 (2013).
4. Wei, Y. et al. Sandwich-type electrochemical immunosensor for the detection of AFP based on Pd octahedral and APTES-M-CeO<sub>2</sub>-GS as signal labels. *Biosens. Bioelectron.* **79**, 482-487 (2016).
5. Jiao, L. et al. Graphene loaded bimetallic Au@Pt nanodendrites enhancing ultrasensitive electrochemical immunoassay of AFP. *Sensor. Actuat. B-Chem.* **231**, 513-519 (2016).
6. Yang, H. et al. Detection and discrimination of alpha-fetoprotein with a label-free electrochemical impedance spectroscopy biosensor array based on lectin functionalized carbon nanotubes. *Talanta* **111**, 62-68 (2013).
7. Kavosi, B., Hallaj, R., Teymourian, H. & Salimi, A. Au nanoparticles/PAMAM dendrimer functionalized wired ethyleneamine-viologen as highly efficient interface

- for ultra-sensitive  $\alpha$ -fetoprotein electrochemical immunosensor. *Biosens. Bioelectron.* **59**, 389-396 (2014).
8. Gao, J. et al. A novel electrochemical immunosensor using  $\beta$ -cyclodextrins functionalized silver supported adamantine-modified glucose oxidase as labels for ultrasensitive detection of alpha-fetoprotein. *Anal. Chim. Acta* **893**, 49-56 (2015).
  9. Yang, Z. et al. Hollow platinum decorated  $\text{Fe}_3\text{O}_4$  nanoparticles as peroxidase mimetic couple with glucose oxidase for pseudobienzyme electrochemical immunosensor. *Sensor. Actuat. B-Chem.* **193**, 461-466 (2014).
  10. Li, X. et al. Enhanced electrochemiluminescence from luminol at carboxyl graphene for detection of  $\alpha$ -fetoprotein. *Anal. Biochem.* **457**, 59-64 (2014).
  11. Parshetti, G.K., Lin, F.H. & Doong, R.A. Sensitive amperometric immunosensor for  $\alpha$ -fetoprotein detection based on multifunctional dumbbell-like Au- $\text{Fe}_3\text{O}_4$  heterostructures. *Sensor. Actuat. B-Chem.* **186**, 34-43 (2013).
  12. Zhou, J. et al. A novel electrochemiluminescent immunosensor based on the quenching effect of aminated graphene on nitrogen-doped carbon quantum dots. *Anal. Chim. Acta* **889**, 82-89 (2015).
  13. Wang, H. et al. Label-free immunosensor based on Pd nanoplates for amperometric immunoassay of alpha-fetoprotein. *Biosens. Bioelectron.* **53**, 305-309 (2014).
  14. Qi, T.T. et al. Label-free alpha fetoprotein immunosensor established by the facile synthesis of a palladium-graphene nanocomposite. *Biosens. Bioelectron.* **61**, 245-250 (2014).
  15. Zhao, L. et al. Enzyme-free electrochemical immunosensor configured with Au-Pd

- nanocrystals and N-doped graphene sheets for sensitive detection of AFP. *Biosens. Bioelectron.* **49**, 222-225 (2013).
16. Fang, X., Han, M., Lu, G., Tu, W. & Dai, Z. Electrochemiluminescence of CdSe quantum dots for highly sensitive competitive immunosensing. *Sensor. Actuat. B-Chem.* **168**, 271-276 (2012).
  17. Xu, R. et al. A sensitive photoelectrochemical biosensor for AFP detection based on ZnO inverse opal electrodes with signal amplification of CdS-QDs. *Biosens. Bioelectron.* **74**, 411-417 (2015).
  18. Liang, R.P., Wang, Z.X., Zhang, L. & Qiu, J.D. A label-free amperometric immunosensor for alpha-fetoprotein determination based on highly ordered porous multi-walled carbon nanotubes/silica nanoparticles array platform. *Sensor. Actuat. B-Chem.* **166–167**, 569-575 (2012).
  19. Yuan, S. et al. Sandwich-type electrochemiluminescence immunosensor based on Ru-silica@Au composite nanoparticles labeled anti-AFP. *Talanta* **82**, 1468-1471 (2010).
  20. Ding, C., Zhao, F., Ren, R. & Lin, J.M. An electrochemical biosensor for  $\alpha$ -fetoprotein based on carbon paste electrode constructed of room temperature ionic liquid and gold nanoparticles. *Talanta* **78**, 1148-1154 (2009).
